# Supplementary material
Source: HighWire-hosted journal article supplement (https://bmjopen.bmj.com/content/11/12/e052826)
Supplement: inline-supplementary-material-2 [file inline-supplementary-material-2.pdf]

# Projet PREVSEX-NETFLIX

## IDENTIFICATION

Coder

Series title

Season number

Episode number

## INCLUSION

1) The series is available on Netflix :

2) The series was launched in 2015 or later

3) The series is labelled "teen TV shows" on Netflix :

4) The series is part of the most watched Netflix series in 2019 :

Does the series is included in the study ?

## EXTRACTION

### Series and episode characteristics

Launched year

Sexual health series

Episode duration

Series genre :

Comedy

Drama

History

Anime

Action

Documentary

Horror

Thriller

Science-Fiction / Fantasy

Romance

Reality

Biopic

Target population

Target age groupe |  |

## Promotion message No.1

Number of scenes  Message duration

Dissemination modality of the message : Auditory   
 Visual  If visual, spatial depiction

Place of the character(s) involved   
 Role model

Age of the character(s) involved 10-15 yo  16-18 yo   
 > 18 yo  NR  NA

Sex of the character(s) involved Man  Woman  Trans   
 NR  NA

Setting

Other, specify : \_\_\_\_\_

Prevention type Factual information  favorable behavior depicted

Message theme \_\_\_\_\_

What's the issue ? \_\_\_\_\_

What's the solution ? \_\_\_\_\_

Visual depiction \_\_\_\_\_

Dialogues transcription \_\_\_\_\_

Coders comments (subjective) \_\_\_\_\_

Is there a 2nd sexual health promotion message ?

## Promotion message No.2

Number of scenes  Message duration

Dissemination modality of the message : Auditory   
 Visual  If visual, spatial depiction

Place of the character(s) involved   
 Role model

Age of the character(s) involved 10-15 yo  16-18 yo   
 > 18 yo  NR  NA

Sex of the character(s) involved Man | | Woman | | Trans | |

NR NA Setting 

Other, specify : \_\_\_\_\_

Prevention type    Factual information                       favorable behavior depicted 

Message theme \_\_\_\_\_

What's the issue ? \_\_\_\_\_

What's the solution ? \_\_\_\_\_

Visual depiction \_\_\_\_\_

Dialogues transcription \_\_\_\_\_

Coders comments (subjective) \_\_\_\_\_

Is there a 3rd sexual health promotion message ? **Promotion message No.3**Number of scenes Message duration Dissemination modality of the message :    Auditory Visual If visual, spatial depiction Place of the character(s) involved Role model 

Age of the character(s) involved

10-15 yo 16-18 yo > 18 yo NR NA 

Sex of the character(s) involved

Man Woman Trans NR NA Setting 

Other, specify : \_\_\_\_\_

Prevention type    Factual information                       favorable behavior depicted 

Message theme \_\_\_\_\_

What's the issue ? \_\_\_\_\_

What's the solution ? \_\_\_\_\_

Visual depiction \_\_\_\_\_

Dialogues transcription \_\_\_\_\_

Coders comments (subjective) \_\_\_\_\_

Is there a 4th sexual health promotion message ?

## Promotion message No.4

Number of scenes  Message duration

Dissemination modality of the message : Auditory   
 Visual  If visual, spatial depiction

Place of the character(s) involved   
 Role model

Age of the character(s) involved 10-15 yo  16-18 yo   
 > 18 yo  NR  NA

Sex of the character(s) involved Man  Woman  Trans   
 NR  NA

Setting

Other, specify : \_\_\_\_\_

Prevention type Factual information  favorable behavior depicted

Message theme \_\_\_\_\_

What's the issue ? \_\_\_\_\_

What's the solution ? \_\_\_\_\_

Visual depiction \_\_\_\_\_

Dialogues transcription \_\_\_\_\_

Coders comments (subjective) \_\_\_\_\_

Is there a 5th sexual health promotion message ?

## Promotion message No.5

Number of scenes  Message duration

Dissemination modality of the message : Auditory   
 Visual  If visual, spatial depiction

Place of the character(s) involved   
 Role model

Age of the character(s) involved 10-15 yo  16-18 yo   
 > 18 yo  NR  NA

Sex of the character(s) involved Man  Woman  Trans   
 NR  NA

Setting

Other, specify : \_\_\_\_\_

Prevention type Factual information favorable behavior depicted 

Message theme \_\_\_\_\_

What's the issue ? \_\_\_\_\_

What's the solution ? \_\_\_\_\_

Visual depiction \_\_\_\_\_

Dialogues transcription \_\_\_\_\_

Coders comments (subjective) \_\_\_\_\_

Is there a 6th sexual health promotion message ? 

## Promotion message No.6

Number of scenes 

Message duration \_\_\_\_\_

Dissemination modality of the message : Auditory Visual If visual, spatial depiction Place of the character(s) involved Role model Age of the character(s) involved 10-15 yo 16-18 yo > 18 yo NR NA Sex of the character(s) involved Man Woman Trans NR NA Setting 

Other, specify : \_\_\_\_\_

Prevention type Factual information favorable behavior depicted 

Message theme \_\_\_\_\_

What's the issue ? \_\_\_\_\_

What's the solution ? \_\_\_\_\_

Visual depiction \_\_\_\_\_

Dialogues transcription \_\_\_\_\_

Coders comments (subjective) \_\_\_\_\_

Is there a 7th sexual health promotion message ?

## Promotion message No.7

Number of scenes  Message duration

Dissemination modality of the message : Auditory   
 Visual  If visual, spatial depiction

Place of the character(s) involved   
 Role model

Age of the character(s) involved 10-15 yo  16-18 yo   
 > 18 yo  NR  NA

Sex of the character(s) involved Man  Woman  Trans   
 NR  NA

Setting

Other, specify : \_\_\_\_\_

Prevention type Factual information  favorable behavior depicted

Message theme \_\_\_\_\_

What's the issue ? \_\_\_\_\_

What's the solution ? \_\_\_\_\_

Visual depiction \_\_\_\_\_

Dialogues transcription \_\_\_\_\_

Coders comments (subjective) \_\_\_\_\_

Is there a 8th sexual health promotion message ?

## Promotion message No.8

Number of scenes  Message duration

Dissemination modality of the message : Auditory   
 Visual  If visual, spatial depiction

Place of the character(s) involved   
 Role model

Age of the character(s) involved 10-15 yo  16-18 yo   
 > 18 yo  NR  NA

Sex of the character(s) involved Man  Woman  Trans   
 NR  NA

Setting

Other, specify : \_\_\_\_\_

Message theme \_\_\_\_\_

What's the issue ? \_\_\_\_\_

What's the solution ? \_\_\_\_\_

Visual depiction \_\_\_\_\_

Dialogues transcription \_\_\_\_\_

Coders comments (subjective) \_\_\_\_\_

Is there a 9th sexual health promotion message ?

### Promotion message No.9

Number of scenes

Message duration \_\_\_\_\_

Dissemination modality of the message : Auditory

Visual

If visual, spatial depiction

Place of the character(s) involved

Role model

Age of the character(s) involved

10-15 yo

16-18 yo

> 18 yo

NR

NA

Sex of the character(s) involved

Man

Woman

Trans

NR

NA

Setting

Other, specify : \_\_\_\_\_

Prevention type Factual information

favorable behavior depicted

Message theme \_\_\_\_\_

What's the issue ? \_\_\_\_\_

What's the solution ? \_\_\_\_\_

Visual depiction \_\_\_\_\_

Dialogues transcription \_\_\_\_\_

Coders comments (subjective) \_\_\_\_\_

Is there a 10th sexual health promotion message ?

## Promotion message No.10

Number of scenes Message duration Dissemination modality of the message : Auditory Visual If visual, spatial depiction Place of the character(s) involved Role model 

Age of the character(s) involved

10-15 yo 16-18 yo > 18 yo NR NA 

Sex of the character(s) involved

Man Woman Trans NR NA Setting 

Other, specify : \_\_\_\_\_

Prevention type Factual information favorable behavior depicted 

Message theme \_\_\_\_\_

What's the issue ? \_\_\_\_\_

What's the solution ? \_\_\_\_\_

Visual depiction \_\_\_\_\_

Dialogues transcription \_\_\_\_\_

Coders comments (subjective) \_\_\_\_\_







## Sexual health themes addressed

Sexual orientation / Gender identity

Prominence within the episode M1  M2  M3  M4  M5  M6  M7  M8  M9  M10  M11  M12  M13  M14  M15 Theme addressed? Transgender Transsexual woman Transsexual man Transvestite Non binary Bicurious Bisexual Cisgender Cissexual Gay Queer Asexual Intersexed Lesbian Questioning Pansexual Androgyny Other 

Specify : \_\_\_\_\_

Planned or unplanned pregnancy

Prominence within the episode M1  M2  M3  M4  M5  M6  M7  M8  M9  M10  M11  M12  M13  M14  M15 Theme addressed ? Risk of unplanned pregnancy Pregnancy denial Unplanned pregnancy but kept Planned pregnancy Adoption Anonymous childbirth Child abandonment

Other 

Specify : \_\_\_\_\_

Mother's age Father's age Abortion Prominence within the episode M1  M2  M3  M4  M5  M6  M7  M8  M9  M10  M11  M12  M13  M14  M15 Theme addressed ? Abortion Medical termination of pregnancy Instrumental method Drug method Other 

Specify : \_\_\_\_\_

The video addresses the technical side (procedure, conditions ...) The video addresses the emotional side (fear, guilt ...) Adolescent / young parenthood Prominence within the episode M1  M2  M3  M4  M5  M6  M7  M8  M9  M10  M11  M12  M13  M14  M15 Theme addressed? Mother's age Father's age Parents present Sexual harassment and violences Prominence within the episode M1  M2  M3  M4  M5  M6  M7  M8  M9  M10  M11  M12  M13  M14  M15 Theme addressed? Attempted rape Rape Sexual abuse Sexual harassment Forced marriage Female genital mutilation Virginity check Sexual exploitation / forced prostitution

Domestic violence Slut shaming Consent notion Other 

Specify \_\_\_\_\_

Victim's sex 

Specify \_\_\_\_\_

Victim's age Committed by : Spouse / partner Friend Family Colleague Classmate Stranger Hierarchy / authority Not reported Not applicable Other 

Specify : \_\_\_\_\_

Self-acceptance / Self-esteem

Prominence within the episode M1  M2  M3  M4  M5  M6  M7  M8  M9  M10  M11  M12  M13  M14  M15 Theme addressed? Body image Self-esteem Relationship to puberty Ashamed of her/his virginity Other 

Specify : \_\_\_\_\_

Discrimination / homophobia / sexism / grossophobia

Prominence within the episode M1  M2  M3  M4  M5  M6  M7  M8  M9  M10  M11  M12  M13  M14  M15 Theme addressed? Biphobia Lesbophobia

Gayphobia Transphobia Serophobia Sexism Grossophobia Other 

Specify: \_\_\_\_\_

In what context / by whom was the discrimination committed?

Work Family Politic Public space Classmate Friends Not reported Not applicable Other 

Specify : \_\_\_\_\_

Reproductive health / biology

Prominence within the episode M1  M2  M3  M4  M5  M6  M7  M8  M9  M10  M11  M12  M13  M14  M15 Theme addressed? Menstrual cycle Female anatomy Male anatomy Conception Other 

Specify : \_\_\_\_\_

Contraception

Prominence within the episode M1  M2  M3  M4  M5  M6  M7  M8  M9  M10  M11  M12  M13  M14  M15 Theme addressed?

- Implant
- Vasectomy
- IUS (hormonal coil)
- Female sterilisation
- IUD (coil)
- Injection
- Vaginal ring
- Patch
- Pill
- Diaphragm
- Male condom
- Cap
- Female condom
- Withdrawal
- Periodic abstinence
- Spermicide
- Emergency contraception
- Other

Specify : \_\_\_\_\_

Video gives :

pros cons brief mention 

STI protection

Prominence within the episode M1  M2  M3  M4  M5  M6  M7  M8  M9  M10  M11  M12  M13  M14  M15 Theme addressed? Male condom Female condom Pre-exposure prophylaxis Hepatitis B vaccine Papillomavirus vaccine Dental dam 

Sexual Transmitted Infections

Prominence within the episode M1  M2  M3  M4  M5  M6  M7  M8  M9  M10  M11  M12  M13  M14  M15 Theme addressed? HIV / AIDS Gonorrhoea Hepatitis B

Genital herpes Mycoplasma genitalium Trichomoniasis Human papillomavirus Syphilis Chlamydia 

Video gives :

Transmission Prevention Symptoms Diagnosis Treatment Long-term consequences Brief mention 

Romantic relationships

Prominence within the episode M1  M2  M3  M4  M5  M6  M7  M8  M9  M10  M11  M12  M13  M14  M15 Theme addressed? Sexfriends Couple Feelings of love Infidelity One night adventure Other  Specify : \_\_\_\_\_

Pleasure, masturbation

Prominence within the episode M1  M2  M3  M4  M5  M6  M7  M8  M9  M10  M11  M12  M13  M14  M15 Theme addressed? Pleasure with partner(s) Female masturbation Male masturbation Other 

Specify : \_\_\_\_\_

Sexual disorders

Prominence within the episode



M1  M2  M3  M4  M5  M6  M7  M8  M9  M10  M11  M12  M13  M14  M15

Theme addressed?

Decreased sexual desire

Sexual aversion

Female arousal disorder

Erectile dysfunction

Orgasm disorder

Premature ejaculation

Dyspareunia

Vaginismus

Other

Specify : \_\_\_\_\_

Puberty

Prominence within the episode

M1  M2  M3  M4  M5  M6  M7  M8  M9  M10  M11  M12  M13  M14  M15

Theme addressed?

Woman's physical change

Man's physical change

1st ejaculation

Nocturnal ejaculation

Spontaneous erection

Modification of emotions

1st menstruation

Other

Specify : \_\_\_\_\_

Does another sexual health theme is addressed within the episode ?

Theme : \_\_\_\_\_

Prominence within the episode

M1  M2  M3  M4  M5  M6  M7  M8  M9  M10  M11  M12  M13  M14  M15

Does incomplete / misleading information is disseminated ?

1st : \_\_\_\_\_

2nd : \_\_\_\_\_

3rd : \_\_\_\_\_

4th : \_\_\_\_\_

5th : \_\_\_\_\_

#### Other youth health themes

Peer pressure

Alcohol

Drug

Tobacco

School bullying

Abuse

Addiction

Depression, suicide

Disease, disability

Social network / digital

Eating disorder

Parents-adolescen relationship

Popularity, rumors

Road safety

Other

Specify : \_\_\_\_\_
