# Supplementary material
Source: HighWire-hosted journal article supplement (https://bmjopen.bmj.com/content/11/12/e052826)
Supplement: inline-supplementary-material-5 [file inline-supplementary-material-5.pdf]

**Multimedia appendix 5: Other health themes addressed in series episodes, in all series and by type of series**

| Other youth health themes:                                                                             | Number of all series' episodes addressing it (n=65)<br>N (%) | Sexual Health Series' Episodes |                    |
|--------------------------------------------------------------------------------------------------------|--------------------------------------------------------------|--------------------------------|--------------------|
|                                                                                                        |                                                              | Yes (n=26)<br>N (%)            | No (n=39)<br>N (%) |
| Alcohol                                                                                                | 44 (68)                                                      | 19 (73)                        | 25 (64)            |
| Drugs                                                                                                  | 44 (68)                                                      | 22 (85)                        | 22 (56)            |
| Parent-adolescent relationship                                                                         | 36 (55)                                                      | 24 (92)                        | 12 (31)            |
| School harassment                                                                                      | 23 (35)                                                      | 10 (39)                        | 13 (33)            |
| Disease, disability                                                                                    | 22 (34)                                                      | 10 (39)                        | 12 (31)            |
| Tobacco                                                                                                | 19 (29)                                                      | 10 (39)                        | 9 (23)             |
| Depression, suicide                                                                                    | 18 (28)                                                      | 1                              | 17 (44)            |
| Social networks, digital                                                                               | 16 (25)                                                      | 10 (39)                        | 6 (15)             |
| Popularity, rumors                                                                                     | 16 (25)                                                      | 10 (39)                        | 6 (15)             |
| Addiction                                                                                              | 9 (14)                                                       | 7 (27)                         | 2                  |
| Abuse                                                                                                  | 6 (9)                                                        | 0                              | 6 (15)             |
| Road safety                                                                                            | 6 (9)                                                        | 2                              | 4 (10)             |
| Peer pressure                                                                                          | 5 (8)                                                        | 4 (15)                         | 1                  |
| Eating disorders                                                                                       | 1 (2)                                                        | 1                              | 0                  |
| Other :<br>Friendship, religion, violence, school problems, theft, racism, being adopted, firearms ... | 61 (94)                                                      | 24 (92)                        | 37 (95)            |
